# Supplementary material
Source: Springer Nature journal article supplement (https://www.springermedizin.de/resource/supplementary/12899_2011_187_MOESM2_ESM.pdf/9514628)

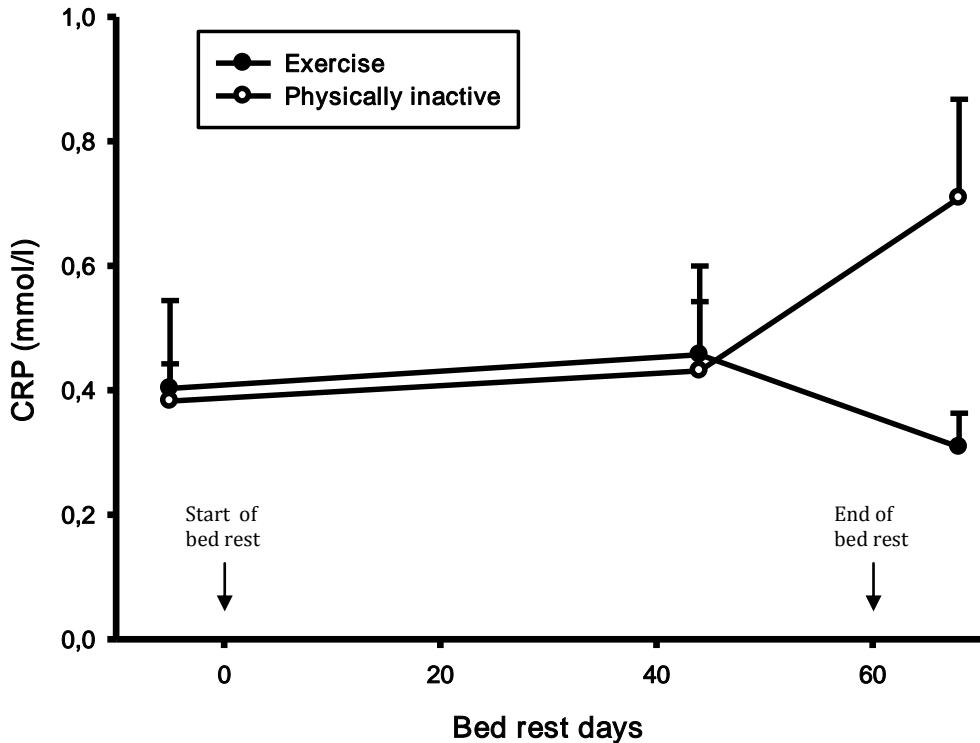

Supplement: MOESM2 [file 9514628]
